# Supplementary material for: Solid and Semisolid Innovative Formulations Containing Miconazole-Loaded Solid Lipid Microparticles to Promote Drug Entrapment into the Buccal Mucosa
Source: MDPI journal article supplement (doi:10.3390/pharmaceutics13091361), 2021-08-29
Supplement: s1 [file s1]

# Supplementary Materials: Solid and Semisolid Innovative Formulations Containing Miconazole-Loaded Solid Lipid Microparticles to Promote Drug Entrapment into the Buccal Mucosa

Viviana De Caro, Libero Italo Giannola and Giulia Di Prima

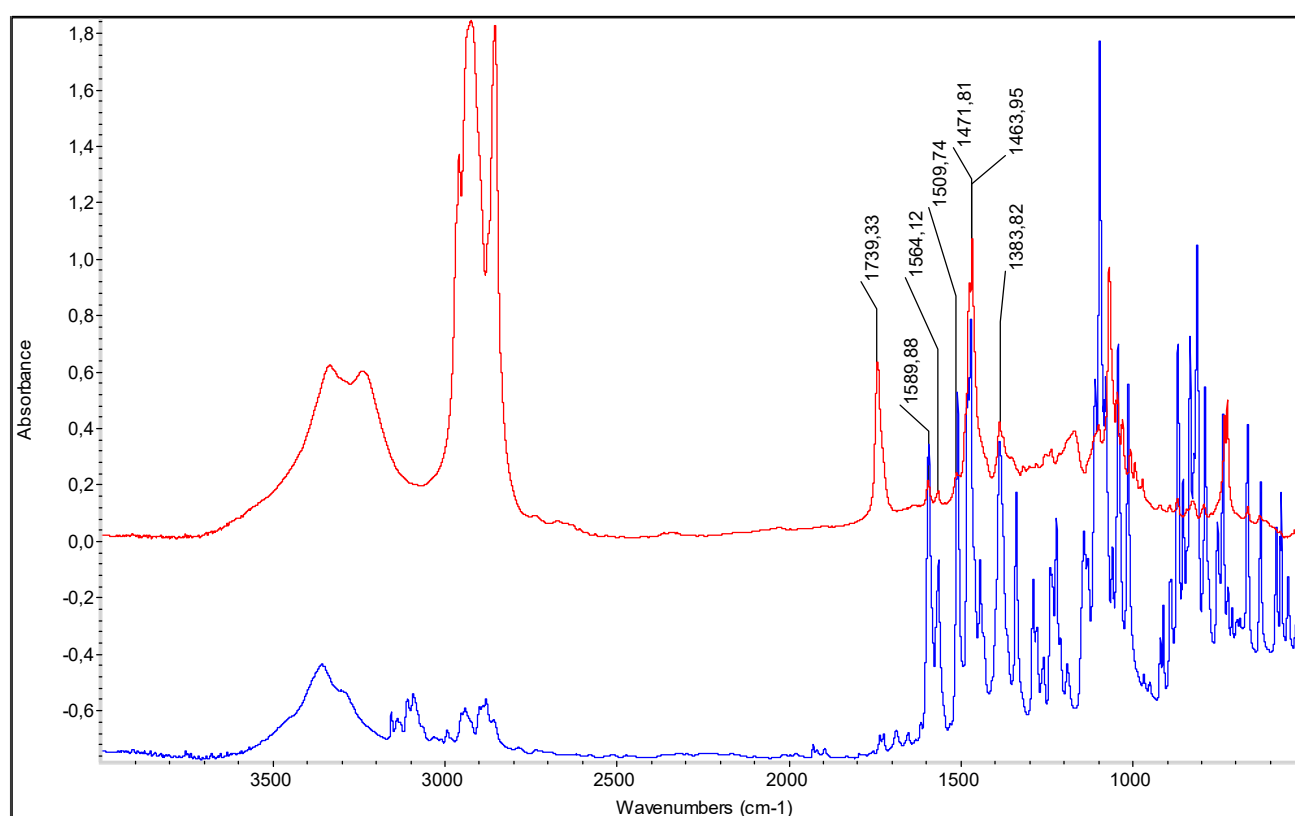

**Figure S1.** FT-IR spectra in KBr of MCZ loaded microspheres (red) and MCZ crystalline pure (blue).

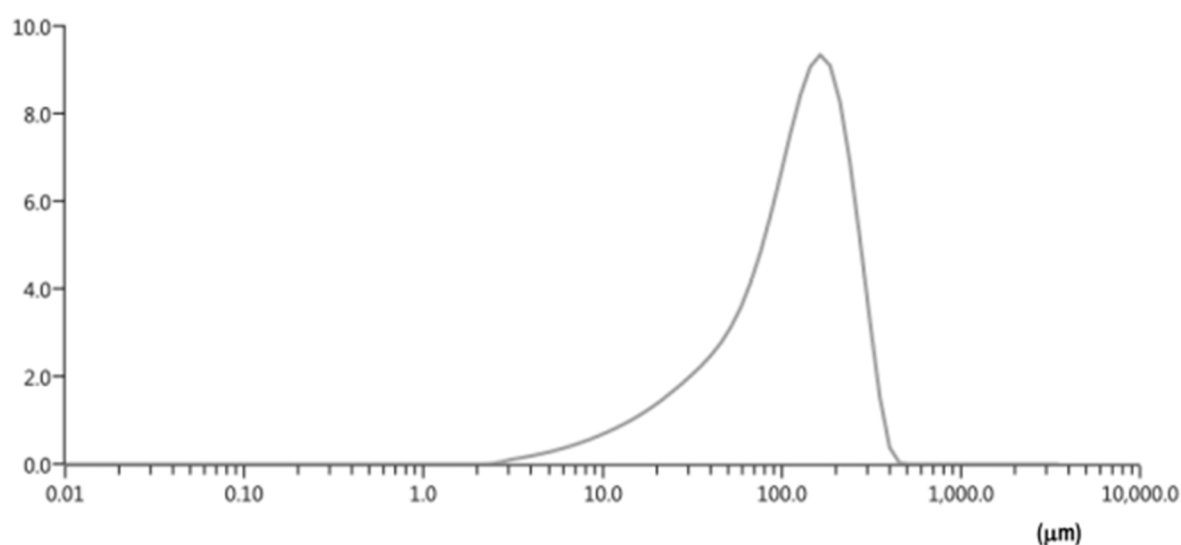

**Figure S2.** Dimensional distribution of a batch of MCZ loaded SLMs by Mastersize 3000, Malvern.

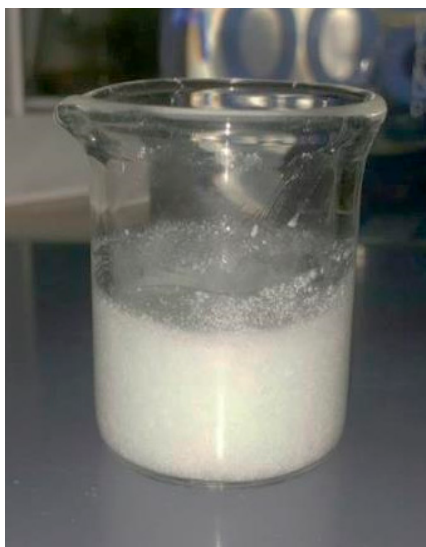

**Figure S3.** Appearance of the SLMs-loaded buccal gel

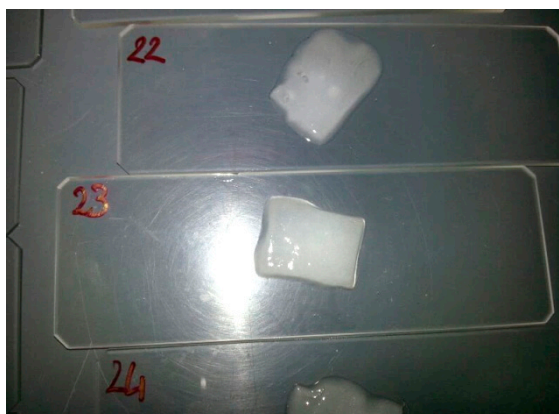

**Figure S4.** SLMs-loaded film D after 15 min of swelling

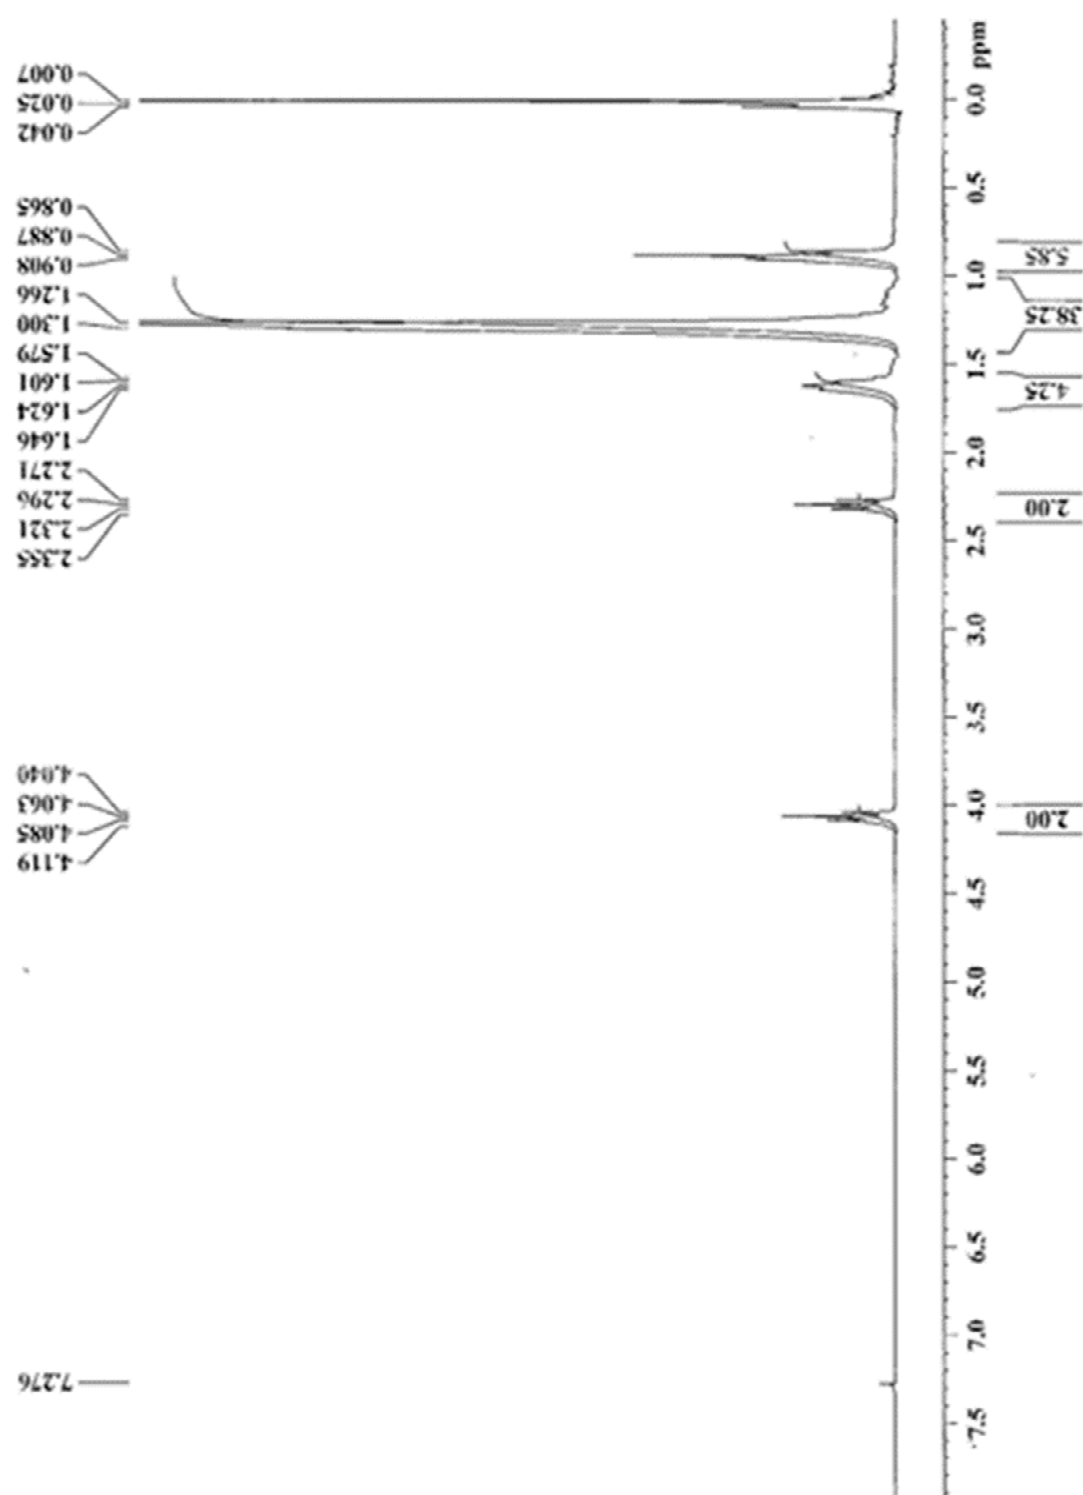Figure S5.  $^1\text{H}$ -NMR of cetyl decanoate

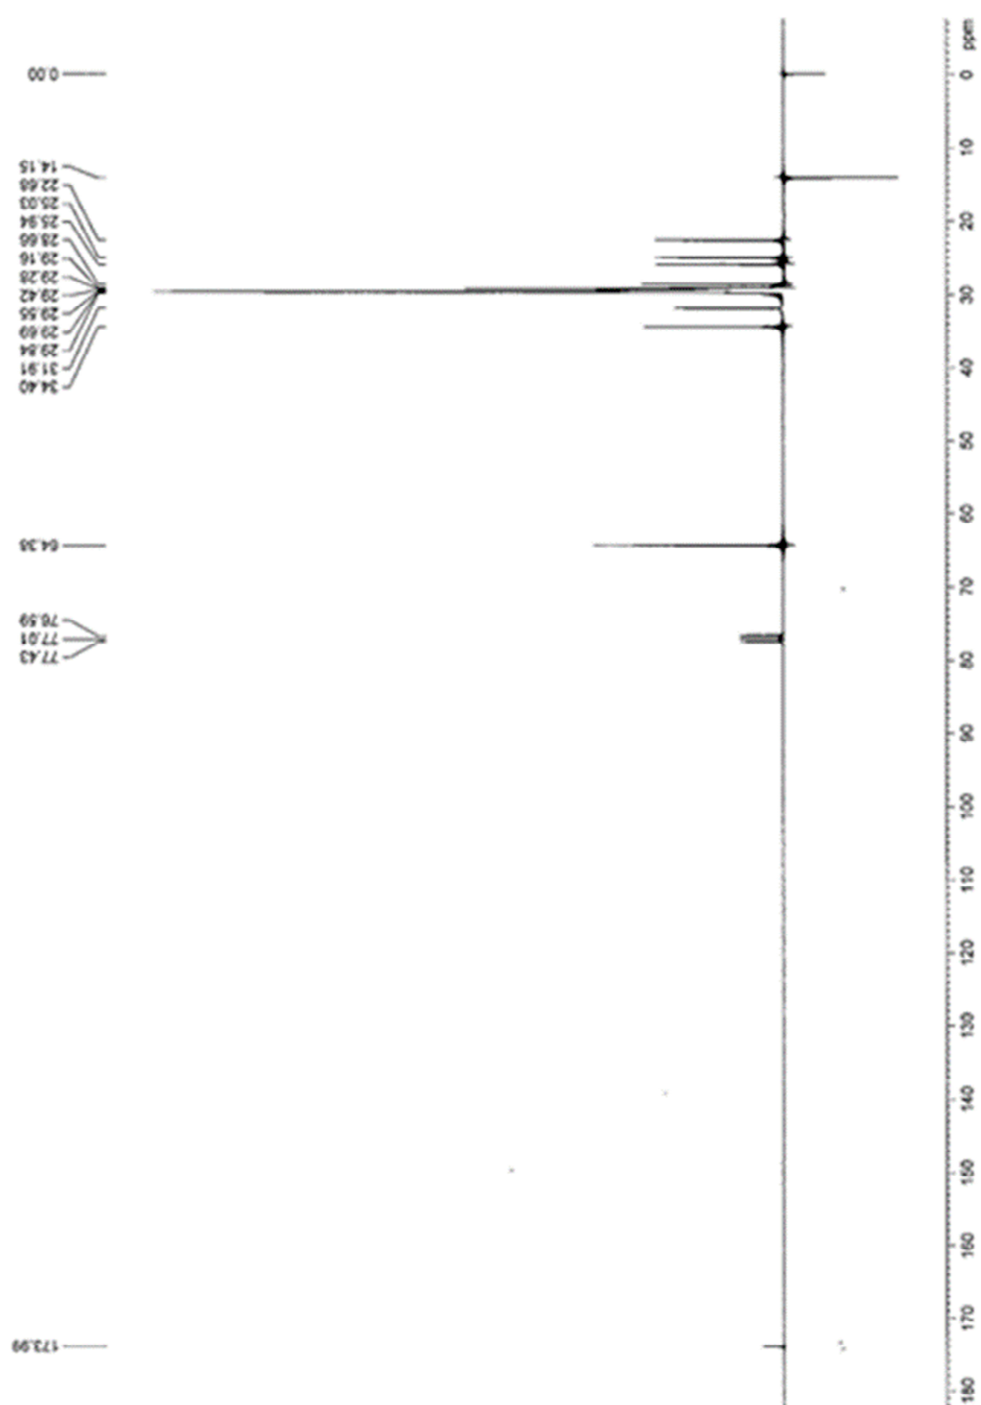

**Figure S6.**  $^{13}\text{C}$ -NMR of cetyl decanoate

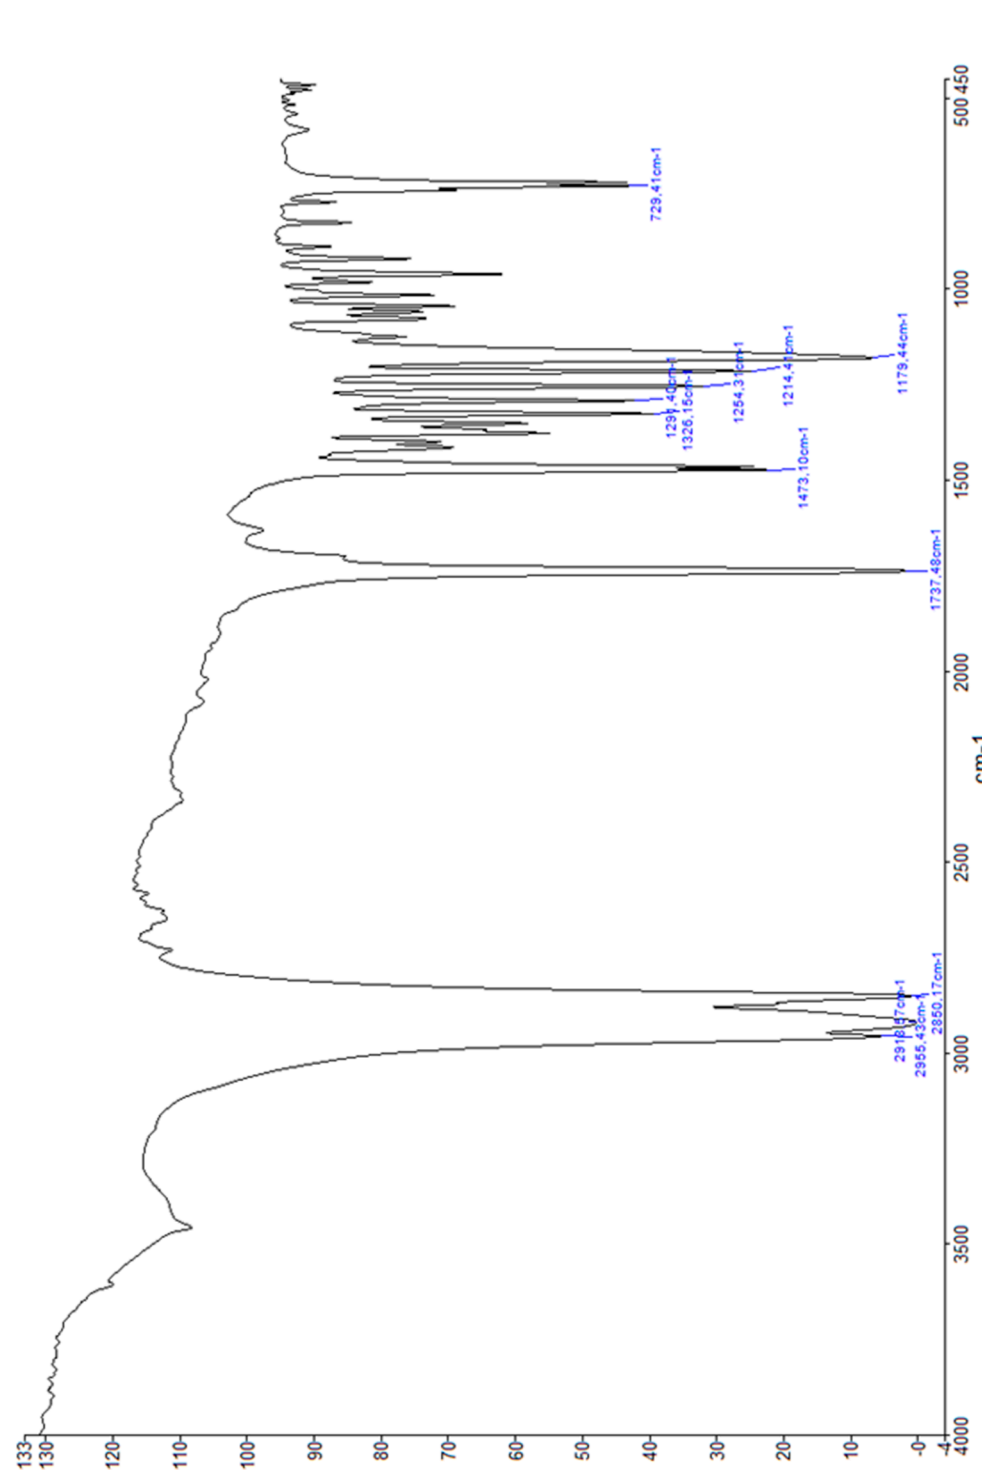

Figure S7. FT-IR of cetyl decanoate

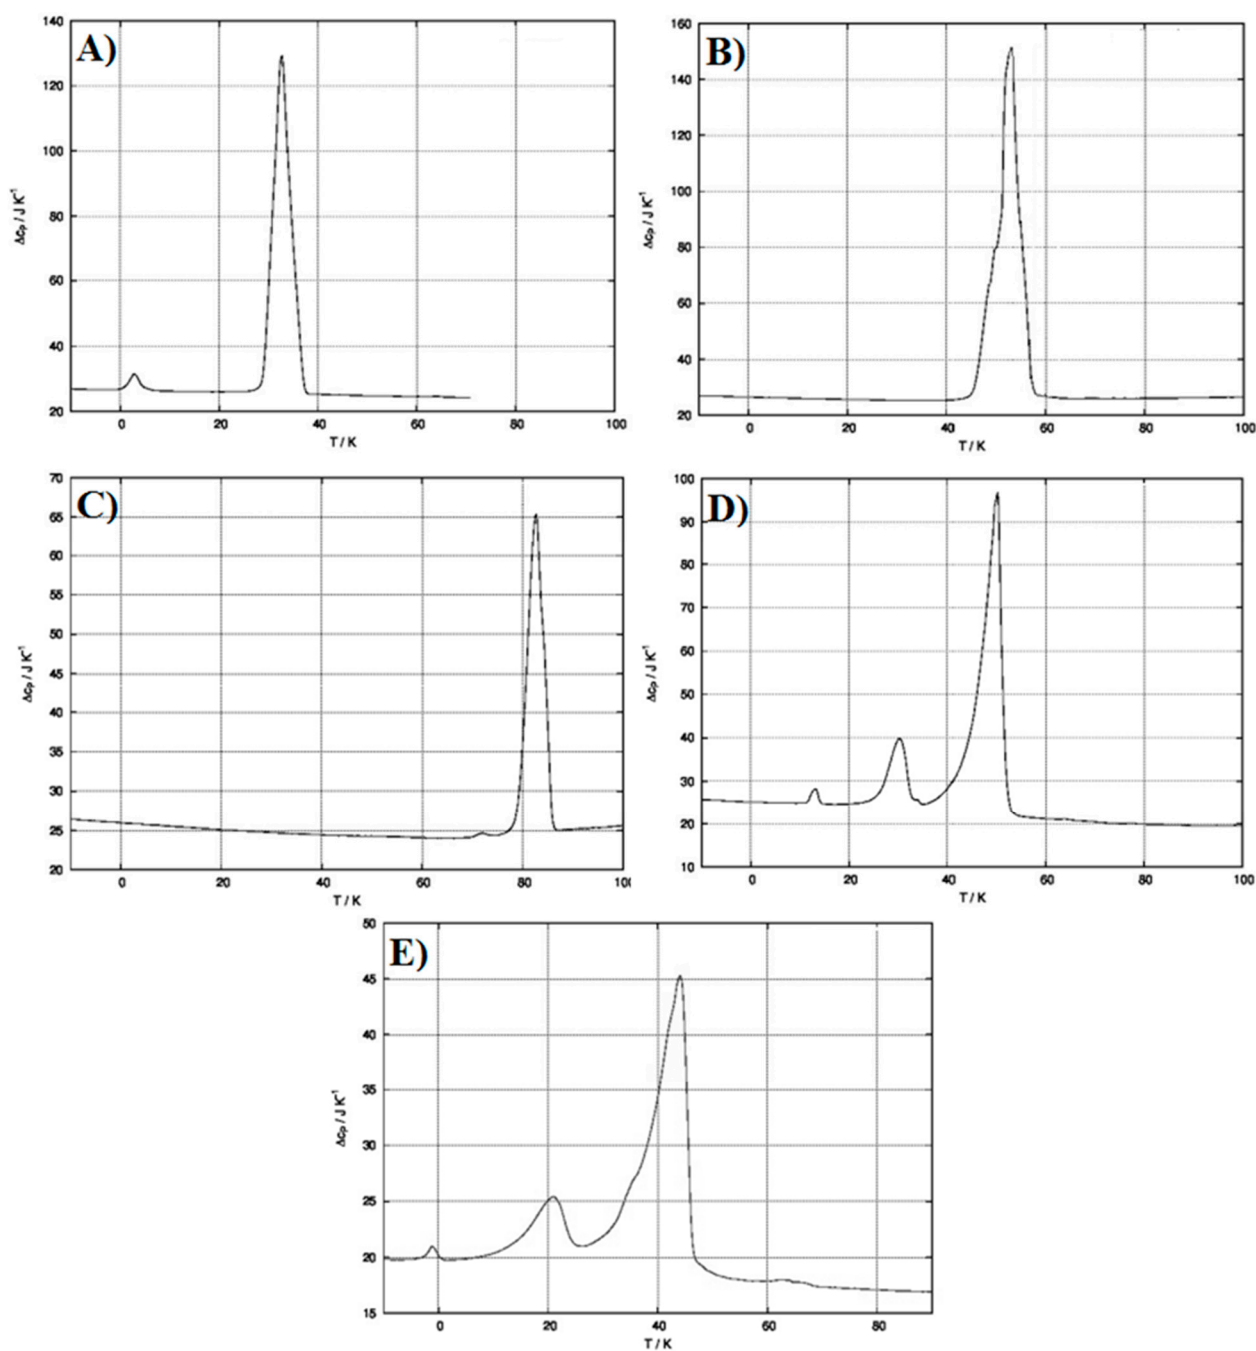

**Figure S8.** DSC thermograms of: A) pure Cetyl Decanoate; B) pure 1-hexadecanol; C) pure MCZ; D) physical mix of cetyl decanoate, 1-hexadecanol and MCZ; E) MCZ-loaded SLMs
